# Supplementary material
Source: PubMed Central journal article supplement (PMC7231652)
Supplement: NIHMS1551451-supplement-1.pdf [file NIHMS1551451-supplement-1.pdf]

## Supplementary Online Content

Song N. et al. Leukocyte Telomere Length and Prevalence of Chronic Health Conditions among Survivors of Childhood Cancer: A Report from the St. Jude Lifetime Cohort

### Contents

|                                                                                                                                                                                                              |    |
|--------------------------------------------------------------------------------------------------------------------------------------------------------------------------------------------------------------|----|
| Supplementary Fig. S1. A flow diagram of the study population. ....                                                                                                                                          | 2  |
| Supplementary Fig. S2. Dynamics of telomere length differs between individuals with no history of cancer and survivors of childhood cancer due to exposures to chemotherapy and/or radiation treatment. .... | 3  |
| Supplementary Fig. S3. Theoretical framework of relationships among telomere length, health behaviors and chronic health conditions.....                                                                     | 4  |
| Supplementary Table S1. Adjusted least square mean of LTL in controls and survivors overall and by diagnoses.....                                                                                            | 5  |
| Supplementary Table S2. Adjusted least square mean of LTL among survivors by cancer treatments .....                                                                                                         | 6  |
| Supplementary Table S3. Associations of LTL with cancer treatment exposures additionally adjusted for health behaviors.....                                                                                  | 7  |
| Supplementary Table S4. Adjusted least square mean of LTL among survivors by cancer treatments in multivariable model.....                                                                                   | 8  |
| Supplementary Table S5. Associations of LTL with non-neoplastic CHCs, subsequent neoplasms, and total mortality .....                                                                                        | 9  |
| Supplementary Table S6. Mean of the number of any CHCs by tertiles of LTL.....                                                                                                                               | 11 |
| Supplementary Table S7. Associations of LTL with risk of non-neoplastic CHCs in multivariable analysis.....                                                                                                  | 12 |
| Supplementary Table S8. Associations of LTL with non-neoplastic CHCs present prior to the measurement of LTL with statistical significance .....                                                             | 16 |
| Supplementary Table S9. Adjusted least square mean of LTL among younger and older survivors by individual health behaviors.....                                                                              | 17 |

**Supplementary Fig. S1. A flow diagram of the study population.**

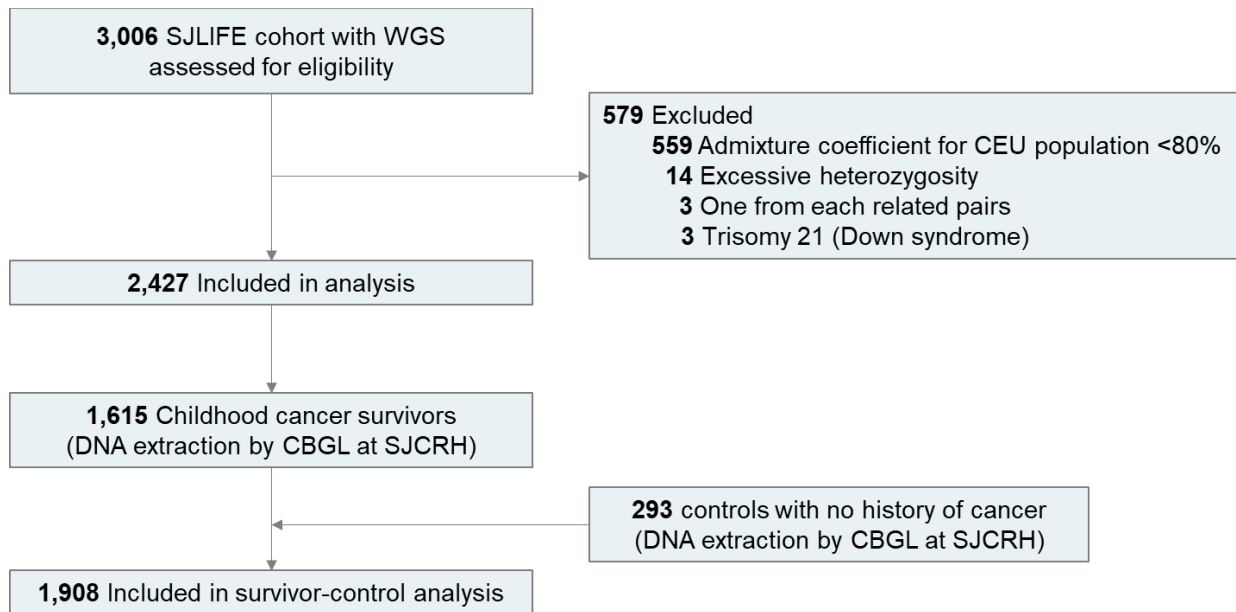

Supplementary Fig. S2. Dynamics of telomere length differs between individuals with no history of cancer and survivors of childhood cancer due to exposures to chemotherapy and/or radiation treatment.

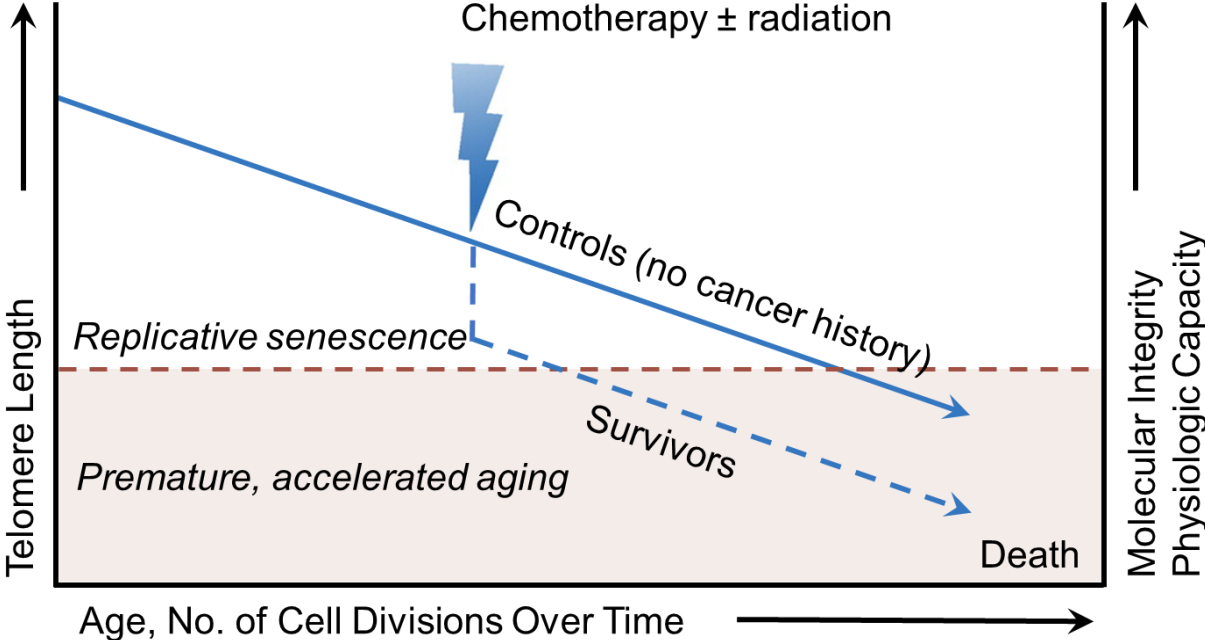

Supplementary Fig. S3. Theoretical framework of relationships among telomere length, health behaviors and chronic health conditions.

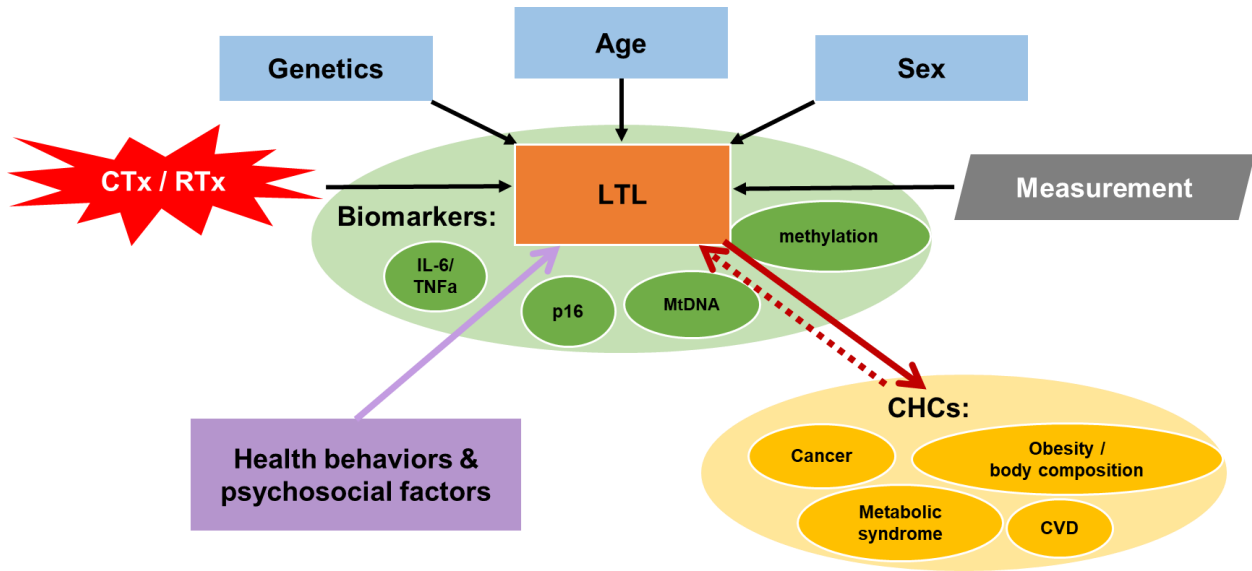

**Supplementary Table S1. Adjusted least square mean of LTL in controls and survivors overall and by diagnoses<sup>a</sup>**

|                                    | Telomere length | (Standard error) | <i>P</i> |
|------------------------------------|-----------------|------------------|----------|
| <b><i>Overall</i></b>              |                 |                  |          |
| Control                            | 6.61            | (0.07)           | Ref.     |
| Survivor                           | 6.14            | (0.03)           | <0.0001  |
| <b><i>By primary diagnosis</i></b> |                 |                  |          |
| Control                            | 6.60            | (0.07)           | Ref.     |
| Sarcoma                            | 6.29            | (0.08)           | 0.03     |
| CNS tumor                          | 6.24            | (0.09)           | <0.01    |
| Neuroblastoma                      | 6.18            | (0.14)           | 0.04     |
| Wilms tumor                        | 6.13            | (0.13)           | 0.01     |
| ALL                                | 6.10            | (0.07)           | <0.0001  |
| Non-Hodgkin lymphoma               | 5.98            | (0.11)           | <0.0001  |
| Hodgkin lymphoma                   | 5.95            | (0.08)           | <0.0001  |
| Other                              | 6.28            | (0.10)           | 0.05     |

<sup>a</sup>Adjusted for sex, DNA sample age, genetic risk score, eigenvectors, and health behaviors.

**Supplementary Table S2. Adjusted least square mean of LTL among survivors by cancer treatments**

| Cancer treatment   | Adjusted LS mean of LTL | (95% CI)    | <i>P</i> |
|--------------------|-------------------------|-------------|----------|
| Brain RT           |                         |             |          |
| No                 | 6.58                    | (6.51-6.65) |          |
| Yes                | 6.56                    | (6.46-6.65) | 0.62     |
| Chest RT           |                         |             |          |
| No                 | 6.62                    | (6.56-6.69) |          |
| Yes                | 6.39                    | (6.29-6.51) | <0.001   |
| Abdomen/Pelvic RT  |                         |             |          |
| No                 | 6.62                    | (6.55-6.69) |          |
| Yes                | 6.37                    | (6.26-6.49) | <0.001   |
| Anthracycline      |                         |             |          |
| No                 | 6.63                    | (6.54-6.71) |          |
| Yes                | 6.54                    | (6.47-6.62) | 0.08     |
| Alkylating agent   |                         |             |          |
| No                 | 6.60                    | (6.52-6.69) |          |
| Yes                | 6.56                    | (6.48-6.63) | 0.33     |
| Glucocorticoids    |                         |             |          |
| No                 | 6.63                    | (6.55-6.71) |          |
| Yes                | 6.50                    | (6.44-6.60) | 0.02     |
| Vincristine        |                         |             |          |
| No                 | 6.66                    | (6.56-6.76) |          |
| Yes                | 6.54                    | (6.47-6.61) | 0.03     |
| Platinum           |                         |             |          |
| No                 | 6.56                    | (6.50-6.63) |          |
| Yes                | 6.67                    | (6.51-6.83) | 0.18     |
| Epipodophyllotoxin |                         |             |          |
| No                 | 6.58                    | (6.51-6.65) |          |
| Yes                | 6.58                    | (6.49-6.68) | 0.86     |

Abbreviations: LS (least square) and LTL (leukocyte telomere length)

**Supplementary Table S3. Associations of LTL with cancer treatment exposures additionally adjusted for health behaviors.**

| Cancer treatment  | Adjusted LS mean of LTL (95% CI) |             | <i>P</i> |
|-------------------|----------------------------------|-------------|----------|
| Chest RT          |                                  |             | <0.001   |
| No                | 6.50                             | (6.40-6.60) |          |
| Yes               | 6.28                             | (6.14-6.42) |          |
| Abdomen/Pelvic RT |                                  |             | <0.001   |
| No                | 6.49                             | (6.39-6.59) |          |
| Yes               | 6.27                             | (6.13-6.42) |          |
| Glucocorticoids   |                                  |             | 0.01     |
| No                | 6.52                             | (6.41-6.64) |          |
| Yes               | 6.39                             | (6.28-6.50) |          |
| Vincristine       |                                  |             | 0.01     |
| No                | 6.56                             | (6.43-6.68) |          |
| Yes               | 6.41                             | (6.31-6.51) |          |

Abbreviations: LS (least square) and LTL (leukocyte telomere length)

**Supplementary Table S4. Adjusted least square mean of LTL among survivors by cancer treatments in multivariable model**

| Cancer treatment  | Adjusted LS mean of LTL | (95% CI)    | <i>P</i> |
|-------------------|-------------------------|-------------|----------|
| Chest RT          |                         |             | 0.22     |
| No                | 6.47                    | (6.33-6.60) |          |
| Yes               | 6.36                    | (6.22-6.50) |          |
| Abdomen/Pelvic RT |                         |             | 0.05     |
| No                | 6.51                    | (6.39-6.63) |          |
| Yes               | 6.32                    | (6.16-6.48) |          |
| Glucocorticoids   |                         |             | 0.02     |
| No                | 6.48                    | (6.37-6.59) |          |
| Yes               | 6.35                    | (6.22-6.48) |          |
| Vincristine       |                         |             | 0.75     |
| No                | 6.42                    | (6.28-6.56) |          |
| Yes               | 6.40                    | (6.30-6.51) |          |

Abbreviations: LS (least square) and LTL (leukocyte telomere length)



**Supplementary Table S5. Associations of LTL with non-neoplastic CHCs, subsequent neoplasms, and total mortality**

|                                       | Total<br>(N=2,427, 100%) |         | 1st Tertile<br>(N=809, 100%) |         | 2nd Tertile<br>(N=809, 100%) |         | 3rd Tertile<br>(N=809, 100%) |         | <i>P</i> <sub>trend</sub> <sup>a</sup> |
|---------------------------------------|--------------------------|---------|------------------------------|---------|------------------------------|---------|------------------------------|---------|----------------------------------------|
|                                       | <i>N</i>                 | (%)     | <i>N</i>                     | (%)     | <i>N</i>                     | (%)     | <i>N</i>                     | (%)     |                                        |
| <b><i>Non-neoplastic CHC</i></b>      |                          |         |                              |         |                              |         |                              |         |                                        |
| Abnormal glucose metabolism           | 111                      | (4.57)  | 43                           | (5.32)  | 36                           | (4.45)  | 32                           | (3.96)  | 0.095                                  |
| Abnormal sperm concentration          | 213                      | (8.78)  | 71                           | (8.78)  | 77                           | (9.52)  | 65                           | (8.03)  | 0.299                                  |
| Amputation                            | 79                       | (3.26)  | 17                           | (2.10)  | 24                           | (2.97)  | 38                           | (4.70)  | 0.002                                  |
| Asthma                                | 49                       | (2.02)  | 14                           | (1.73)  | 20                           | (2.47)  | 15                           | (1.85)  | 0.430                                  |
| Cardiac dysrhythmia                   | 28                       | (1.15)  | 7                            | (0.87)  | 9                            | (1.11)  | 12                           | (1.48)  | 0.122                                  |
| Cardiomyopathy                        | 102                      | (4.20)  | 44                           | (5.44)  | 32                           | (3.96)  | 26                           | (3.21)  | 0.013                                  |
| Cataract                              | 61                       | (2.51)  | 18                           | (2.22)  | 23                           | (2.84)  | 20                           | (2.47)  | 0.375                                  |
| Cerebrovascular accident              | 59                       | (2.43)  | 22                           | (2.72)  | 20                           | (2.47)  | 17                           | (2.10)  | 0.210                                  |
| Cervical dysplasia                    | 70                       | (2.88)  | 20                           | (2.47)  | 25                           | (3.09)  | 25                           | (3.09)  | 0.229                                  |
| Cholecystitis                         | 198                      | (8.16)  | 76                           | (9.39)  | 66                           | (8.16)  | 56                           | (6.92)  | 0.035                                  |
| Chronic hepatitis C                   | 55                       | (2.27)  | 22                           | (2.72)  | 21                           | (2.60)  | 12                           | (1.48)  | 0.047                                  |
| Chronic kidney disease                | 25                       | (1.03)  | 13                           | (1.61)  | 4                            | (0.49)  | 8                            | (0.99)  | 0.109                                  |
| Chronic obstructive pulmonary disease | 20                       | (0.82)  | 9                            | (1.11)  | 4                            | (0.49)  | 7                            | (0.87)  | 0.291                                  |
| Hypercholesterolemia                  | 23                       | (0.95)  | 9                            | (1.11)  | 11                           | (1.36)  | 3                            | (0.37)  | 0.062                                  |
| Hypertriglyceridemia                  | 52                       | (2.14)  | 26                           | (3.21)  | 15                           | (1.85)  | 11                           | (1.36)  | 0.005                                  |
| Dysphagia                             | 58                       | (2.39)  | 22                           | (2.72)  | 20                           | (2.47)  | 16                           | (1.98)  | 0.164                                  |
| Endometriosis                         | 61                       | (2.51)  | 17                           | (2.10)  | 20                           | (2.47)  | 24                           | (2.97)  | 0.133                                  |
| Enucleation                           | 51                       | (2.10)  | 12                           | (1.48)  | 16                           | (1.98)  | 23                           | (2.84)  | 0.028                                  |
| Esophageal stricture                  | 66                       | (2.72)  | 26                           | (3.21)  | 22                           | (2.72)  | 18                           | (2.22)  | 0.111                                  |
| Esophagitis                           | 23                       | (0.95)  | 9                            | (1.11)  | 8                            | (0.99)  | 6                            | (0.74)  | 0.221                                  |
| Fibrosis/cirrhosis                    | 73                       | (3.01)  | 28                           | (3.46)  | 30                           | (3.71)  | 15                           | (1.85)  | 0.029                                  |
| Gastritis/duodenitis                  | 50                       | (2.06)  | 25                           | (3.09)  | 17                           | (2.10)  | 8                            | (0.99)  | 0.001                                  |
| Gastrointestinal obstruction          | 22                       | (0.91)  | 8                            | (0.99)  | 6                            | (0.74)  | 8                            | (0.99)  | 0.500                                  |
| Gastrointestinal tract infection      | 68                       | (2.80)  | 21                           | (2.60)  | 23                           | (2.84)  | 24                           | (2.97)  | 0.326                                  |
| Gastrointestinal ulcer                | 30                       | (1.24)  | 15                           | (1.85)  | 8                            | (0.99)  | 7                            | (0.87)  | 0.036                                  |
| Genitourinary adhesions               | 44                       | (1.81)  | 18                           | (2.22)  | 12                           | (1.48)  | 14                           | (1.73)  | 0.228                                  |
| Headaches                             | 89                       | (3.67)  | 38                           | (4.70)  | 28                           | (3.46)  | 23                           | (2.84)  | 0.024                                  |
| Hearing loss                          | 279                      | (11.50) | 96                           | (11.87) | 99                           | (12.24) | 84                           | (10.38) | 0.175                                  |
| Heart valve disorder                  | 35                       | (1.44)  | 8                            | (0.99)  | 14                           | (1.73)  | 13                           | (1.61)  | 0.149                                  |
| Hernia                                | 132                      | (5.44)  | 43                           | (5.32)  | 44                           | (5.44)  | 45                           | (5.56)  | 0.413                                  |
| Hypertension                          | 170                      | (7.00)  | 66                           | (8.16)  | 56                           | (6.92)  | 48                           | (5.93)  | 0.040                                  |
| Intervertebral disc disorder          | 48                       | (1.98)  | 15                           | (1.85)  | 23                           | (2.84)  | 10                           | (1.24)  | 0.186                                  |
| Intracranial hemorrhage               | 22                       | (0.91)  | 5                            | (0.62)  | 6                            | (0.74)  | 11                           | (1.36)  | 0.058                                  |
| Limb length discrepancy               | 22                       | (0.91)  | 9                            | (1.11)  | 9                            | (1.11)  | 4                            | (0.49)  | 0.095                                  |
| Lymphatic infection                   | 23                       | (0.95)  | 11                           | (1.36)  | 7                            | (0.87)  | 5                            | (0.62)  | 0.062                                  |
| Myocardial Infarction                 | 118                      | (4.86)  | 41                           | (5.07)  | 44                           | (5.44)  | 33                           | (4.08)  | 0.178                                  |
| Obesity                               | 962                      | (39.64) | 346                          | (42.77) | 326                          | (40.30) | 290                          | (35.85) | 0.002                                  |
| Obstructive pulmonary deficit         | 97                       | (4.00)  | 43                           | (5.32)  | 30                           | (3.71)  | 24                           | (2.97)  | 0.008                                  |
| Obstructive sleep apnea               | 127                      | (5.23)  | 47                           | (5.81)  | 42                           | (5.19)  | 38                           | (4.70)  | 0.158                                  |
| Obstructive uropathy                  | 30                       | (1.24)  | 10                           | (1.24)  | 11                           | (1.36)  | 9                            | (1.11)  | 0.411                                  |
| Osteonecrosis                         | 30                       | (1.24)  | 10                           | (1.24)  | 12                           | (1.48)  | 8                            | (0.99)  | 0.326                                  |
| Otitis media                          | 24                       | (0.99)  | 9                            | (1.11)  | 8                            | (0.99)  | 7                            | (0.87)  | 0.308                                  |
| Peripheral motor neuropathy           | 55                       | (2.27)  | 20                           | (2.47)  | 19                           | (2.35)  | 16                           | (1.98)  | 0.252                                  |
| Peripheral sensory neuropathy         | 69                       | (2.84)  | 20                           | (2.47)  | 27                           | (3.34)  | 22                           | (2.72)  | 0.382                                  |
| Pleural space disorders               | 21                       | (0.87)  | 7                            | (0.87)  | 8                            | (0.99)  | 6                            | (0.74)  | 0.394                                  |
| Primary ovarian failure               | 152                      | (6.26)  | 56                           | (6.92)  | 50                           | (6.18)  | 46                           | (5.69)  | 0.152                                  |
| Prosthetic malfunction                | 33                       | (1.36)  | 4                            | (0.49)  | 17                           | (2.10)  | 12                           | (1.48)  | 0.043                                  |
| Pulmonary diffusion deficits          | 45                       | (1.85)  | 18                           | (2.22)  | 16                           | (1.98)  | 11                           | (1.36)  | 0.099                                  |
| Pulmonary embolism                    | 26                       | (1.07)  | 5                            | (0.62)  | 12                           | (1.48)  | 9                            | (1.11)  | 0.167                                  |

|                                                   |           |               |           |               |           |               |           |               |              |
|---------------------------------------------------|-----------|---------------|-----------|---------------|-----------|---------------|-----------|---------------|--------------|
| Restrictive pulmonary deficit                     | 52        | (2.14)        | 27        | (3.34)        | 14        | (1.73)        | 11        | (1.36)        | 0.003        |
| Retinopathy                                       | 27        | (1.11)        | 10        | (1.24)        | 10        | (1.24)        | 7         | (0.87)        | 0.239        |
| Scoliosis                                         | 46        | (1.90)        | 15        | (1.85)        | 17        | (2.10)        | 14        | (1.73)        | 0.428        |
| Seizure                                           | 125       | (5.15)        | 38        | (4.70)        | 46        | (5.69)        | 41        | (5.07)        | 0.368        |
| Sinopulmonary infection<br>(Sinusitis)            | 43        | (1.77)        | 12        | (1.48)        | 16        | (1.98)        | 15        | (1.85)        | 0.286        |
| Soft tissue infection                             | 53        | (2.18)        | 15        | (1.85)        | 20        | (2.47)        | 18        | (2.22)        | 0.305        |
| Tonsillitis                                       | 114       | (4.70)        | 37        | (4.57)        | 36        | (4.45)        | 41        | (5.07)        | 0.319        |
| Urinary tract calculi<br>(Urolithiasis)           | 72        | (2.97)        | 31        | (3.83)        | 17        | (2.10)        | 24        | (2.97)        | 0.153        |
| Uterine bleeding                                  | 94        | (3.87)        | 32        | (3.96)        | 30        | (3.71)        | 32        | (3.96)        | 0.500        |
| Vascular disease                                  | 20        | (0.82)        | 7         | (0.87)        | 8         | (0.99)        | 5         | (0.62)        | 0.291        |
| <b>Subsequent neoplasms</b>                       |           |               |           |               |           |               |           |               |              |
| Meningioma (brain-RT) <sup>b</sup>                | 101       | (12.67)       | 35        | (13.16)       | 38        | (14.34)       | 28        | (10.53)       | 0.181        |
| Breast cancer (chest-RT) <sup>c</sup>             | 36        | (9.52)        | 10        | (7.94)        | 12        | (9.52)        | 14        | (11.11)       | 0.195        |
| Thyroid cancer (neck-RT) <sup>d</sup>             | 52        | (4.62)        | 12        | (3.20)        | 22        | (5.87)        | 18        | (4.79)        | 0.150        |
| Non-melanoma skin cancer<br>(any-RT) <sup>e</sup> | 147       | (10.55)       | 39        | (8.39)        | 61        | (13.15)       | 47        | (10.11)       | 0.197        |
| Sarcoma (any-RT)                                  | 14        | (1.00)        | 5         | (1.08)        | 3         | (0.65)        | 6         | (1.29)        | 0.371        |
| Meningioma (out of RT field)                      | 2         | (0.08)        | NA        | NA            | NA        | NA            | 2         | (0.25)        | NA           |
| Breast cancer (out of RT field)                   | 12        | (0.49)        | 3         | (0.37)        | 6         | (0.74)        | 3         | (0.37)        | 0.500        |
| Thyroid cancer (out of RT field)                  | 15        | (0.62)        | 2         | (0.25)        | 4         | (0.49)        | 9         | (1.11)        | 0.013        |
| Non-melanoma skin cancer<br>(out of RT field)     | 55        | (2.27)        | 17        | (2.10)        | 24        | (2.97)        | 14        | (1.73)        | 0.306        |
| Sarcoma (out of RT field)                         | 13        | (0.54)        | 4         | (0.50)        | 3         | (0.37)        | 6         | (0.74)        | 0.249        |
| <b>Total mortality</b>                            | <b>76</b> | <b>(3.13)</b> | <b>29</b> | <b>(3.58)</b> | <b>28</b> | <b>(3.46)</b> | <b>19</b> | <b>(2.35)</b> | <b>0.077</b> |

Abbreviations: LTL (leukocyte telomere length), CHC (chronic health condition), GRS (genetic risk score), and FDR (false discovery rate).

<sup>a</sup>Cochran-Armitage Trend test was carried out for each 3x2 cross-tabulation of incidence of specific disease based on tertiles of residual of LTL regressed against age at DNA sampling, DNA extraction methods, GRS and treatment exposure.

<sup>b</sup>total number of survivors with brain-RT is 797.

<sup>c</sup>total number of survivors with chest-RT is 378.

<sup>d</sup>total number of survivors with neck-RT is 1126.

<sup>e</sup>total number of survivors with any-RT is 1395.

**Supplementary Table S6. Mean of the number of any CHCs by tertiles of LTL**

|                         | The number of any CHCs |           | <i>P</i> |
|-------------------------|------------------------|-----------|----------|
|                         | Mean (SD)              | 95% CI    |          |
| LTL tertile             |                        |           |          |
| 1 <sup>st</sup> tertile | 2.34 (2.33)            | 2.19-2.48 |          |
| 2 <sup>nd</sup> tertile | 2.25 (2.21)            | 2.11-2.40 | 0.45     |
| 3 <sup>rd</sup> tertile | 1.99 (1.93)            | 1.84-2.14 | 0.001    |

Abbreviations: CHC (chronic health condition).

**Supplementary Table S7. Associations of LTL with risk of non-neoplastic CHCs in multivariable analysis**

|                              | Obesity          |       | Hypertriglyceridemia |             | Restrictive pulmonary deficit |             | Cardiomyopathy   |       |
|------------------------------|------------------|-------|----------------------|-------------|-------------------------------|-------------|------------------|-------|
|                              | RR (95% CI)      | P     | RR (95% CI)          | P           | RR (95% CI)                   | P           | RR (95% CI)      | P     |
| Age adjusted Telomere length |                  | 0.16  |                      | 0.06        |                               | 0.02        |                  | 0.16  |
| 1st tertile                  | Ref              |       | Ref                  |             | Ref                           |             | Ref              |       |
| 2nd tertile                  | 1.02 (0.88-1.21) | 0.77  | 0.44 (0.20-0.99)     | <b>0.05</b> | 0.49 (0.24-0.96)              | <b>0.05</b> | 0.90 (0.54-1.48) | 0.67  |
| 3rd tertile                  | 0.88 (0.75-1.04) | 0.14  | 0.51(0.23-1.10)      | 0.09        | 0.43 (0.20-0.88)              | <b>0.03</b> | 0.66 (0.39-1.18) | 0.15  |
| Sex                          |                  |       |                      |             |                               |             |                  |       |
| Male                         | Ref              |       | Ref                  |             | -                             |             | -                |       |
| Female                       | 0.85 (0.74-0.98) | 0.02  | 0.28 (0.13-0.62)     | <0.01       | -                             | -           | -                | -     |
| Age at diagnosis             |                  |       |                      |             |                               |             |                  |       |
| 0-4                          | Ref              |       | -                    |             | Ref                           |             | -                |       |
| 5-9                          | 0.92 (0.76-1.12) | 0.40  | -                    | -           | 0.53 (0.25-1.14)              | 0.10        | -                | -     |
| 10-14                        | 1.31 (1.06-1.61) | 0.01  | -                    | -           | 0.34 (0.14-0.76)              | 0.01        | -                | -     |
| 15+                          | 1.63 (1.28-2.09) | <0.01 | -                    | -           | 0.29 (0.11-0.73)              | 0.01        | -                | -     |
| Brain RT                     |                  |       |                      |             |                               |             |                  |       |
| None                         | Ref              |       | Ref                  |             | -                             |             | -                |       |
| <25Gy                        | 2.69 (2.18-3.35) | <0.01 | 2.57 (1.16-5.40)     | 0.02        | -                             | -           | -                | -     |
| ≥25Gy                        | 1.39 (1.08-1.80) | 0.01  | 2.56 (1.04-6.06)     | 0.04        | -                             | -           | -                | -     |
| Chest RT                     |                  |       |                      |             |                               |             |                  |       |
| None                         | -                |       | -                    |             | Ref                           |             | Ref              |       |
| <25Gy                        | -                | -     | -                    | -           | 6.03 (2.01-16.78)             | <0.01       | 1.36 (0.63-2.85) | 0.42  |
| ≥25Gy                        | -                | -     | -                    | -           | 28.17 (12.18-65.46)           | <0.01       | 2.22 (1.07-4.22) | 0.02  |
| Abdomen/Pelvic RT            |                  |       |                      |             |                               |             |                  |       |
| None                         | -                |       | -                    |             | -                             |             | -                |       |
| <25Gy                        | -                | -     | -                    | -           | -                             | -           | -                | -     |
| ≥25Gy                        | -                | -     | -                    | -           | -                             | -           | -                | -     |
| Anthracyclines               |                  |       |                      |             |                               |             |                  |       |
| None                         | -                |       | -                    |             | Ref                           |             | Ref              |       |
| 1st tertile                  | -                | -     | -                    | -           | 0.39 (0.12-1.20)              | 0.11        | 1.04 (0.36-3.24) | 0.94  |
| 2nd tertile                  | -                | -     | -                    | -           | 0.20 (0.06-0.63)              | 0.01        | 2.19 (0.99-4.96) | 0.06  |
| 3rd tertile                  | -                | -     | -                    | -           | 1.01 (0.51-2.01)              | 0.97        | 4.64 (2.23-9.77) | <0.01 |
| Alkylating agents            |                  |       |                      |             |                               |             |                  |       |
| None                         | -                |       | -                    |             | Ref                           |             | Ref              |       |
| 1st tertile                  | -                | -     | -                    | -           | 6.12 (2.54-14.22)             | <0.0001     | 2.05 (0.92-4.47) | 0.07  |
| 2nd tertile                  | -                | -     | -                    | -           | 2.63 (0.88-7.26)              | 0.07        | 2.49 (1.15-5.16) | 0.02  |
| 3rd tertile                  | -                | -     | -                    | -           | 3.73 (1.73-8.32)              | <0.01       | 2.48 (1.14-5.16) | 0.02  |

|                      |                  |       |                  |      |   |   |   |                  |       |
|----------------------|------------------|-------|------------------|------|---|---|---|------------------|-------|
| Glucocorticoids      |                  |       |                  |      |   |   |   |                  |       |
| None                 | -                |       |                  |      |   |   |   |                  |       |
| 1st tertile          | -                | -     | -                | -    | - | - | - | -                | -     |
| 2nd tertile          | -                | -     | -                | -    | - | - | - | -                | -     |
| 3rd tertile          | -                | -     | -                | -    | - | - | - | -                | -     |
| Vincristine          |                  |       |                  |      |   |   |   |                  |       |
| None                 | -                |       |                  |      |   |   |   |                  |       |
| 1st tertile          | -                | -     | -                | -    | - | - | - | -                | -     |
| 2nd tertile          | -                | -     | -                | -    | - | - | - | -                | -     |
| 3rd tertile          | -                | -     | -                | -    | - | - | - | -                | -     |
| Platinum             |                  |       |                  |      |   |   |   |                  |       |
| None                 | -                |       |                  |      |   |   |   | Ref              |       |
| 1st tertile          | -                | -     | -                | -    | - | - | - | 4.52 (2.01-9.84) | <0.01 |
| 2nd tertile          | -                | -     | -                | -    | - | - | - | 2.87 (1.07-7.82) | 0.04  |
| 3rd tertile          | -                | -     | -                | -    | - | - | - | 1.45 (0.44-4.15) | 0.51  |
| Epipodophyllotoxins  |                  |       |                  |      |   |   |   |                  |       |
| None                 |                  | Ref   |                  |      |   |   |   |                  |       |
| 1st tertile          | 0.71 (0.57-0.90) | <0.01 |                  |      |   |   |   |                  |       |
| 2nd tertile          | 0.60 (0.48-0.76) | <0.01 |                  |      |   |   |   |                  |       |
| 3rd tertile          | 0.50 (0.38-0.64) | <0.01 |                  |      |   |   |   |                  |       |
| Health behaviors     |                  |       |                  |      |   |   |   |                  |       |
| Unfavorable          |                  | Ref   |                  | Ref  |   |   |   |                  |       |
| Intermediate         | 0.98 (0.80-1.18) | 0.82  | 1.56 (0.61-4.26) | 0.37 |   |   |   |                  |       |
| Favorable            | 0.71 (0.57-0.88) | <0.01 | 0.58 (0.17-1.87) | 0.37 |   |   |   |                  |       |
| Primary diagnosis    |                  |       |                  |      |   |   |   |                  |       |
| Other                |                  | Ref   |                  |      |   |   |   | Ref              |       |
| CNS                  | 0.70 (0.50-1.00) | 0.05  |                  |      |   |   |   | 0.16 (0.01-1.93) | 0.18  |
| Sarcoma              | 1.03 (0.77-1.40) | 0.82  |                  |      |   |   |   | 1.47 (0.52-4.20) | 0.47  |
| Hodgkin lymphoma     | 0.93 (0.67-1.27) | 0.65  |                  |      |   |   |   | 2.59 (0.89-8.41) | 0.10  |
| Non-Hodgkin lymphoma | 1.03 (0.73-1.42) | 0.88  |                  |      |   |   |   | 2.05 (0.68-6.37) | 0.21  |
| Neuroblastoma        | 1.30 (0.90-1.95) | 0.18  |                  |      |   |   |   | 0.73 (0.15-3.28) | 0.69  |
| Wilms tumor          | 0.75 (0.51-1.13) | 0.16  |                  |      |   |   |   | 1.05 (0.21-5.33) | 0.96  |
| ALL                  | 1.38 (1.02-1.81) | 0.03  |                  |      |   |   |   | 1.18 (0.40-3.44) | 0.77  |

Abbreviations: leukocyte telomere length (LTL), chronic health condition (CHC), relative risk (RR), radiation therapy (RT), CNS (central nervous system), and ALL (Acute lymphocytic leukemia).

All regression models adjusted for attained age as cubic splines and significant eigenvectors.

**Supplementary Table S7. Associations of LTL with risk of non-neoplastic CHCs in multivariable analysis (continued)**

|                              | Chronic Hepatitis C |       | Headache          |       | Hypertension     |      | Obstructive pulmonary deficit |       |
|------------------------------|---------------------|-------|-------------------|-------|------------------|------|-------------------------------|-------|
|                              | RR (95% CI)         | P     | RR (95% CI)       | P     | RR (95% CI)      | P    | RR (95% CI)                   | P     |
| Age adjusted Telomere length |                     | 0.23  |                   | 0.07  |                  | 0.24 |                               | 0.06  |
| 1st tertile                  | Ref                 |       | Ref               |       | Ref              |      | Ref                           |       |
| 2nd tertile                  | 0.96 (0.54-1.85)    | 0.90  | 0.84 (0.44-1.59)  | 0.60  | 0.77 (0.49-1.18) | 0.24 | 0.71 (0.43-1.15)              | 0.18  |
| 3rd tertile                  | 0.63 (0.30-1.28)    | 0.22  | 0.51 (0.25-1.06)  | 0.07  | 0.76 (0.48-1.18) | 0.23 | 0.63 (0.37-1.06)              | 0.08  |
| Sex                          |                     |       |                   |       |                  |      |                               |       |
| Male                         | -                   |       | Ref               |       | -                |      | -                             |       |
| Female                       | -                   | -     | 5.09 (2.46-10.88) | <0.01 | -                | -    | -                             | -     |
| Age at diagnosis             |                     |       |                   |       |                  |      |                               |       |
| 0-4                          | -                   |       | -                 |       | -                |      | Ref                           |       |
| 5-9                          | -                   | -     | -                 | -     | -                | -    | 0.67 (0.38-1.18)              | 0.16  |
| 10-14                        | -                   | -     | -                 | -     | -                | -    | 0.57 (0.33-1.02)              | 0.05  |
| 15+                          | -                   | -     | -                 | -     | -                | -    | 0.35 (0.18-0.68)              | <0.01 |
| Brain RT                     |                     |       |                   |       |                  |      |                               |       |
| None                         | Ref                 |       | Ref               |       | -                |      | -                             |       |
| <25Gy                        | 3.22 (1.52-6.53)    | <0.01 | 4.01 (1.60-11.54) | <0.01 | -                | -    | -                             | -     |
| ≥25Gy                        | 0.16 (0.01-1.33)    | 0.13  | 1.69 (0.58-4.40)  | 0.31  | -                | -    | -                             | -     |
| Chest RT                     |                     |       |                   |       |                  |      |                               |       |
| None                         | -                   |       | -                 |       | -                |      | Ref                           |       |
| <25Gy                        | -                   | -     | -                 | -     | -                | -    | 4.63 (2.41-9.40)              | <0.01 |
| ≥25Gy                        | -                   | -     | -                 | -     | -                | -    | 16.75 (9.93-30.02)            | <0.01 |
| Abdomen/Pelvic RT            |                     |       |                   |       |                  |      |                               |       |
| None                         | -                   |       | -                 |       | -                |      | -                             |       |
| <25Gy                        | -                   | -     | -                 | -     | -                | -    | -                             | -     |
| ≥25Gy                        | -                   | -     | -                 | -     | -                | -    | -                             | -     |
| Anthracyclines               |                     |       |                   |       |                  |      |                               |       |
| None                         | -                   |       | Ref               |       | -                |      | -                             |       |
| 1st tertile                  | -                   | -     | 0.29 (0.09-0.88)  | 0.03  | -                | -    | -                             | -     |
| 2nd tertile                  | -                   | -     | 0.63 (0.27-1.46)  | 0.29  | -                | -    | -                             | -     |
| 3rd tertile                  | -                   | -     | 0.70 (0.26-1.76)  | 0.47  | -                | -    | -                             | -     |
| Alkylating agents            |                     |       |                   |       |                  |      |                               |       |
| None                         | Ref                 |       | -                 |       | -                |      | Ref                           |       |
| 1st tertile                  | 1.03 (0.41-2.46)    | 0.95  | -                 | -     | -                | -    | 2.74 (1.36-5.22)              | <0.01 |
| 2nd tertile                  | 2.04 (0.84-4.96)    | 0.11  | -                 | -     | -                | -    | 2.62 (1.28-5.46)              | 0.01  |
| 3rd tertile                  | 2.54 (1.16-5.51)    | 0.02  | -                 | -     | -                | -    | 3.56 (1.97-6.11)              | <0.01 |

|                      |                  |      |                   |      |                  |       |   |                  |      |
|----------------------|------------------|------|-------------------|------|------------------|-------|---|------------------|------|
| Glucocorticoids      |                  |      |                   |      |                  |       |   |                  |      |
| None                 | Ref              |      | -                 |      | -                |       |   | Ref              |      |
| 1st tertile          | 2.64 (1.05-6.63) | 0.04 | -                 | -    | -                | -     | - | 0.89 (0.49-1.55) | 0.70 |
| 2nd tertile          | 2.32 (0.93-6.03) | 0.08 | -                 | -    | -                | -     | - | 0.43 (0.22-0.81) | 0.01 |
| 3rd tertile          | 1.00 (0.33-3.23) | 1.00 | -                 | -    | -                | -     | - | 0.17 (0.03-0.76) | 0.03 |
| Vincristine          |                  |      |                   |      |                  |       |   |                  |      |
| None                 | -                |      | -                 |      | -                |       |   | -                |      |
| 1st tertile          | -                | -    | -                 | -    | -                | -     | - | -                | -    |
| 2nd tertile          | -                | -    | -                 | -    | -                | -     | - | -                | -    |
| 3rd tertile          | -                | -    | -                 | -    | -                | -     | - | -                | -    |
| Platinum             |                  |      |                   |      |                  |       |   |                  |      |
| None                 | -                |      | -                 |      | Ref              |       |   | -                |      |
| 1st tertile          | -                | -    | -                 | -    | 1.11 (0.43-2.75) | 0.83  | - | -                | -    |
| 2nd tertile          | -                | -    | -                 | -    | 2.58 (1.03-5.89) | 0.03  | - | -                | -    |
| 3rd tertile          | -                | -    | -                 | -    | 0.26 (0.02-1.98) | 0.25  | - | -                | -    |
| Epipodophyllotoxins  |                  |      |                   |      |                  |       |   |                  |      |
| None                 | -                |      | Ref               |      | Ref              |       |   | -                |      |
| 1st tertile          | -                | -    | 1.28 (0.57-2.85)  | 0.54 | 0.91 (0.48-1.61) | 0.75  | - | -                | -    |
| 2nd tertile          | -                | -    | 0.17 (0.03-0.86)  | 0.03 | 0.28 (0.10-0.72) | <0.01 | - | -                | -    |
| 3rd tertile          | -                | -    | 0.31 (0.08-1.05)  | 0.07 | 0.65 (0.31-1.27) | 0.23  | - | -                | -    |
| Health behaviors     |                  |      |                   |      |                  |       |   |                  |      |
| Unfavorable          | -                |      | -                 |      | Ref              |       |   | -                |      |
| Intermediate         | -                | -    | -                 | -    | 1.24 (0.76-2.06) | 0.40  | - | -                | -    |
| Favorable            | -                | -    | -                 | -    | 0.66 (0.37-1.24) | 0.18  | - | -                | -    |
| Primary diagnosis    |                  |      |                   |      |                  |       |   |                  |      |
| Other                | -                |      | Ref               |      | -                |       |   | -                |      |
| CNS                  | -                | -    | 1.26 (0.29-5.34)  | 0.76 | -                | -     | - | -                | -    |
| Sarcoma              | -                | -    | 1.14 (0.21-6.39)  | 0.88 | -                | -     | - | -                | -    |
| Hodgkin lymphoma     | -                | -    | 5.97 (1.60-22.01) | 0.01 | -                | -     | - | -                | -    |
| Non-Hodgkin lymphoma | -                | -    | 1.54 (0.23-11.55) | 0.67 | -                | -     | - | -                | -    |
| Neuroblastoma        | -                | -    | 1.54 (0.20-9.95)  | 0.66 | -                | -     | - | -                | -    |
| Wilms tumor          | -                | -    | 1.62 (0.25-8.32)  | 0.59 | -                | -     | - | -                | -    |
| ALL                  | -                | -    | 2.12 (0.52-8.04)  | 0.28 | -                | -     | - | -                | -    |

Abbreviations: leukocyte telomere length (LTL), chronic health condition (CHC), relative risk (RR), radiation therapy (RT), CNS (central nervous system), and ALL (Acute lymphocytic leukemia).

All regression models adjusted for attained age as cubic splines and significant eigenvectors.

**Supplementary Table S8. Associations of LTL with non-neoplastic CHCs present prior to the measurement of LTL with statistical significance**

|                                   | Total<br>(N=2,427, 100%) |        | 1st Tertile<br>(N=809, 100%) |        | 2nd Tertile<br>(N=809, 100%) |        | 3rd Tertile<br>(N=809, 100%) |       | <i>P</i> <sub>trend</sub> |
|-----------------------------------|--------------------------|--------|------------------------------|--------|------------------------------|--------|------------------------------|-------|---------------------------|
|                                   | N                        | (%)    | N                            | (%)    | N                            | (%)    | N                            | (%)   |                           |
| <b><i>Non-neoplastic CHCs</i></b> |                          |        |                              |        |                              |        |                              |       |                           |
| Hypertriglyceridemia              | 20                       | (0.8)  | 11                           | (1.4)  | 8                            | (1.0)  | 1                            | (0.1) | 0.006                     |
| Gastritis/Duodenitis              | 43                       | (1.8)  | 19                           | (2.3)  | 16                           | (2.0)  | 8                            | (1.0) | 0.038                     |
| Headaches                         | 63                       | (2.6)  | 31                           | (3.8)  | 17                           | (2.1)  | 15                           | (1.9) | 0.012                     |
| Obesity                           | 288                      | (11.9) | 112                          | (13.8) | 99                           | (12.2) | 77                           | (9.5) | 0.007                     |
| Obstructive pulmonary deficit     | 33                       | (1.4)  | 16                           | (2.0)  | 12                           | (1.5)  | 5                            | (0.6) | 0.018                     |

Abbreviations: LTL (leukocyte telomere length), CHC (chronic health condition), and GRS (genetic risk score).



**Supplementary Table S9. Adjusted least square mean of LTL among younger and older survivors by individual health behaviors**

| Health behavior                        | Adjusted LS mean of LTL | (95% CI)    | P    |
|----------------------------------------|-------------------------|-------------|------|
| <b>Younger age group (18-35 years)</b> |                         |             |      |
| Physical activity                      |                         |             | 0.87 |
| ≥150min/week                           | 6.14                    | (5.94-6.34) |      |
| <150min/week                           | 6.12                    | (5.93-6.31) |      |
| Strength                               |                         |             | 0.08 |
| Normal                                 | 6.23                    | (6.03-6.44) |      |
| Abnormal                               | 6.06                    | (5.87-6.25) |      |
| Smoking status                         |                         |             | 0.09 |
| Never                                  | 6.14                    | (5.97-6.32) |      |
| Ever                                   | 5.95                    | (5.71-6.20) |      |
| Healthy eating index                   |                         |             | 0.26 |
| Normal                                 | 6.15                    | (5.97-6.33) |      |
| Abnormal                               | 6.03                    | (5.79-6.26) |      |
| Alcohol intake                         |                         |             | 0.39 |
| Moderate drinking                      | 6.15                    | (5.96-6.34) |      |
| Not moderate drinking                  | 6.07                    | (5.87-6.26) |      |
| <b>Older age group (&gt;35 years)</b>  |                         |             |      |
| Physical activity                      |                         |             | 0.63 |
| ≥150min/week                           | 5.60                    | (5.45-5.76) |      |
| <150min/week                           | 5.65                    | (5.50-5.79) |      |
| Strength                               |                         |             | 0.84 |
| Normal                                 | 5.64                    | (5.44-5.83) |      |
| Abnormal                               | 5.62                    | (5.48-5.75) |      |
| Smoking status                         |                         |             | 0.98 |
| Never                                  | 5.62                    | (5.48-5.76) |      |
| Ever                                   | 5.62                    | (5.46-5.79) |      |
| Healthy eating index                   |                         |             | 0.12 |
| Normal                                 | 5.65                    | (5.52-5.78) |      |
| Abnormal                               | 5.47                    | (5.24-5.69) |      |
| Alcohol intake                         |                         |             | 0.34 |
| Moderate drinking                      | 5.56                    | (5.40-5.72) |      |
| Not moderate drinking                  | 5.65                    | (5.51-5.80) |      |

Abbreviations: LS (least square) and LTL (leukocyte telomere length)
